# Supplementary material for: Proteomic Analysis of Proteins Related to Defense Responses in Arabidopsis Plants Transformed with the rolB Oncogene
Source: MDPI journal article supplement (doi:10.3390/ijms24031880), 2023-01-18
Supplement: s1 [file s1]

## SUPPLEMENTARY INFORMATION

### Proteomic analysis of proteins related to defense responses in *Arabidopsis* plants transformed with the *rolB* oncogene

Yulia V. Vereshchagina<sup>a</sup>, Anastasiya A. Mironova<sup>a</sup>, Dmitry V. Bulgakov<sup>a</sup>, Victor P. Bulgakov<sup>a,\*</sup>

<sup>a</sup>Federal Scientific Center of the East Asia Terrestrial Biodiversity, Far East Branch of Russian Academy of Sciences, 159 Stoletija Str., Vladivostok, 690022, Russia

**Supplementary Table S1.** Sequences of the PCR primers used in this study

**Supplementary Table S2.** Comparison of protein expression and expression of the corresponding genes

**Supplementary Figure S1.** Standard curve for absolute quantification of *rolB* expression.

**Supplementary Figure S2.** Induction of proteins of the PYK10 complex by the *rolB* gene.

**Supplementary Table S1.** Sequences of the PCR primers used in this study

| UniProtKB code          | Genbank accession number | Primer name        | Primer sequences (5'-3') | Ref. |
|-------------------------|--------------------------|--------------------|--------------------------|------|
| P20402<br>(ROB1_AGRRH)  | X03433                   | <i>rolB</i> -780-D | ATGGATCCCAAATTGCTATTC    | [1]  |
|                         |                          | <i>rolB</i> -780-R | TTAGGCTTCTTTCTTCAGGTT    |      |
|                         |                          | <i>rolB</i> -D     | ACATCATAGGGGCGGTTTTTCAGT | [2]  |
|                         |                          | <i>rolB</i> -R     | TTTCGCAAGTTCCTTGTTTCATTC |      |
| Q84K90<br>(RHIP1_ARATH) | BT002964                 | <i>RHIP1</i> -D    | GAGCTGAAGTGGCTTCAATGAC   | [3]  |
|                         |                          | <i>RHIP1</i> -R    | GGTCCGACATACCCATGATCC    |      |
| O24456<br>(GBLPA_ARATH) | AY035007                 | <i>RACK1A</i> -D   | GCTGAAAAGGCTGACAACAGT    | [4]  |
|                         |                          | <i>RACK1A</i> -R   | GCTCCAGTTAAGGCTTGTGC     |      |
| Q9C4Z6<br>(GPLPB_ARATH) | AY059723                 | <i>RACK1B</i> -D   | TGTTGAGGATTTGAAGGTTGA    |      |
|                         |                          | <i>RACK1B</i> -R   | CCAGTTCAAGCTTGTGCAGTA    |      |
| Q9LV28<br>(GPLPC_ARATH) | AY050338                 | <i>RACK1C</i> -D   | GAGGCAGAGAAGAATGAAGGTG   |      |
|                         |                          | <i>RACK1C</i> -R   | CCAGTTCAAGCTTGTGCAGTA    |      |
| P34790                  | AY093227                 | <i>CYP18-3</i> -D  | GAACGGAACAGGCGGTGAG      |      |

|                          |          |                  |                           |     |
|--------------------------|----------|------------------|---------------------------|-----|
| (CP18C_ARATH)            |          | <i>CYP18-3-R</i> | TCAAGCCAATCGGTCTTCACG     |     |
| Q38867<br>(CP19C_ARATH)  | AY072128 | <i>CYP19-3-D</i> | CTTTCACCGTATAATCCCAG      | [5] |
|                          |          | <i>CYP19-3-R</i> | CCTGTCAAGATCAACCCACCC     |     |
| Q38900<br>(CP19A_ARATH)  | AY048215 | <i>CYP19-1-D</i> | GGTCAAGTTGTTGAGGGATTG     |     |
|                          |          | <i>CYP19-1-R</i> | ACACAAAGCTACCATTGGATC     |     |
| P34791<br>(CP20C_ARATH)  | AF325026 | <i>CYP20-3-D</i> | CAATGCATCGGTCAATAGTG      | [5] |
|                          |          | <i>CYP20-3-R</i> | CTGGTGAGAAGAAATACGGG      |     |
| Q42406<br>(CP18D_ARATH)  | AY054468 | <i>CYP18-4-D</i> | ATCTACGGTGCTAAGTTCAAGG    |     |
|                          |          | <i>CYP18-4-R</i> | GTGCTTACCATCTAACCACGAC    |     |
| A8R7E6<br>(CERK1_ARATH)  | AB367524 | <i>CERK1-D</i>   | TTATAGGAGTGATTGTGGCTTTG   |     |
|                          |          | <i>CERK1-R</i>   | CCTTAGTAGACAACGGAATAGAAGA |     |
| Q39023<br>(MPK3_ARATH)   | AF386961 | <i>MPK3-D</i>    | GCCCTTAGCTAAACTTTTCTC     | [6] |
|                          |          | <i>MPK3-R</i>    | CGTGCAATTTAGCAAGGTACT     |     |
| Q39024<br>(MPK4_ARATH)   | AF360231 | <i>MPK4-D</i>    | AGCAGACGCATCACAGTTGA      |     |
|                          |          | <i>MPK4-R</i>    | TGAACGGCCTCACACATACC      |     |
| Q39026<br>(MPK6_ARATH)   | AY120737 | <i>MPK6-D</i>    | CGTTTGTTCGGCTATGAATTCTG   | [7] |
|                          |          | <i>MPK6-R</i>    | GTGGCGGGATAATATCTCTGATTG  |     |
| Q9XI87<br>(Q9XI87_ARATH) | BT026491 | <i>VIK-D</i>     | ATGGCTCCTGAAGTATTCAAGC    | [8] |
|                          |          | <i>VIK-R</i>     | TCTTGAGAATGTCCAGAAACGACG  |     |
| P43082<br>(HEVL_ARATH)   | AF370536 | <i>HEL-D</i>     | TGTTCTCCGACCAACAACACTG    |     |
|                          |          | <i>HEL-R</i>     | GTTCTTCACCCTTAAACACTTGC   |     |
| O49195<br>(VSP1_ARATH)   | AF386930 | <i>VSP1-D</i>    | CATCTCATACTCAAGCCAAACG    |     |
|                          |          | <i>VSP1-R</i>    | AGTATCCTCAACCAAATCAGC     |     |
| O82122<br>(VSP2_ARATH)   | AY048282 | <i>VSP2-D</i>    | ATGGATACGGAACAGAGAAGACC   |     |
|                          |          | <i>VSP2-R</i>    | CGAGAGTGACATTCTTCCACAAC   |     |
| Q9SR37<br>(BGL23_ARATH)  | AF386967 | <i>BGLU23 -D</i> | CGTCAATGCTAAATGCCAAGA     |     |
|                          |          | <i>BGLU23 -R</i> | CGAACCAAGCAGGACTATGTG     |     |
| O04314                   | AF370488 | <i>PBP1-D</i>    | TACCAAAGGCCGTGTTCTCC      |     |

|                         |          |                   |                        |     |
|-------------------------|----------|-------------------|------------------------|-----|
| (JAL30_ARATH)           |          | <i>PBP1</i> -R    | CATCCCATACAGTTCCGTCATC |     |
| Q03250<br>(RBG7_ARATH)  | AF428381 | <i>RBG7</i> -D    | GCGACGTTATTGATTCCAAG   |     |
|                         |          | <i>RBG7</i> -R    | TTGTCCGTTTCATTCCCTCA   |     |
| Q9LKR3<br>(BIP1_ARATH)  | BT000453 | <i>BIP1</i> /2-D  | TCACTTGGGAGGTGAGGACTTT | [9] |
| Q39043<br>(BIP2_ARATH)  | BT002392 | <i>BIP1</i> /2-R  | CTCACATTCCCTTCGGAGCTTA |     |
| Q9LTX9<br>(HSP7G_ARATH) | BT000919 | <i>HSP70</i> -7-D | CAACTCAAGAAATCAAAGACAC | [5] |
|                         |          | <i>HSP70</i> -7-R | CGTCAATCACATCACCGCCG   |     |
| Q9SIF2<br>(HS905_ARATH) | AF436826 | <i>HSP90</i> -5-D | CTTCTCCTTGTGTGCTTGTC   |     |
|                         |          | <i>HSP90</i> -5-R | CTTGTTGCTTCAGTGCTCTC   |     |
| O65282<br>(CH10C_ARATH) | AJ010818 | <i>CPN20</i> -D   | CCGAGACTACCAAAGAGAAG   |     |
|                         |          | <i>CPN20</i> -R   | CTAAGAAAGTATAGCCATCAC  |     |

**Supplementary Table S2.** Comparison of protein expression and expression of the corresponding genes; data from the present study and previous study for *rolB* transformed calli.

| Protein Name                         | UniProtKB code        | rolB-plants      |                | rolB-calli           |
|--------------------------------------|-----------------------|------------------|----------------|----------------------|
|                                      |                       | Protein<br>(2DE) | mRNA<br>(qPCR) | Protein<br>(2DE) [5] |
| RACK1-associated proteins            |                       |                  |                |                      |
| RACK1A                               | O24456 (GBLPA_ARATH)  | 1,48* down       | 1,44** down    | 1,5* down            |
| RACK1B                               | Q9C4Z6 (GPLPB_ARATH)  | 3,8* down        | 1,7* down      | Not found            |
| RACK1C                               | Q9LV28 (GPLPC_ARATH)  | 4,2* down        | 3,55* down     | Not found            |
| Defense reactions and plant immunity |                       |                  |                |                      |
| PBP1 (JAL30)                         | O04314 (JAL30_ARATH)  | 10* up           | 2,18* up       | Not found            |
| PYK10 (BGL23)                        | Q9SR37 (BGL23_ARATH)  | 10* up           | 2,24* up       | Not found            |
| GRP7                                 | Q03250 (RBG7_ARATH)   | 1,98* down       | 3,31* down     | Not found            |
| HEVL                                 | P43082 (HEVL_ARATH)   | 10* up           | 9,04* up       | Not found            |
| VIK                                  | Q9XI87 (Q9XI87_ARATH) | Not found        | 1,03 down      | 2* down              |
| VSP1                                 | O49195 (VSP1_ARATH)   | 3,4* up          | 2,73** up      | Not found            |

|                                   |                                            |                |                   |                  |
|-----------------------------------|--------------------------------------------|----------------|-------------------|------------------|
| VSP2                              | O82122 (VSP2_ARATH)                        | <b>6,7* up</b> | <b>2,58** up</b>  | Not found        |
| <i>CERK1-associated proteins.</i> |                                            |                |                   |                  |
| CERK1                             | A8R7E6 (CERK1_ARATH)                       | Not found      | 1,05 up           | Not found        |
| MPK3                              | Q39023 (MPK3_ARATH)                        | Not found      | 1,06 down         | Not found        |
| MPK4                              | Q39024 (MPK4_ARATH)                        | Not found      | 1,43 up           | Not found        |
| MPK6                              | Q39026 (MPK6_ARATH)                        | Not found      | 1,28 up           | Not found        |
| <i>Chaperone-type proteins.</i>   |                                            |                |                   |                  |
| BIP1/2                            | Q9LKR3 (BIP1_ARATH)<br>Q39043 (BIP2_ARATH) | <b>2,8* up</b> | <b>2,55* up</b>   | Not found        |
| HSP70-7                           | Q9LTX9 (HSP7G_ARATH)                       | Not found      | 1,104 up          | <b>2,9* up</b>   |
| HSP90-5                           | Q9SIF2 (HS905_ARATH)                       | Not found      | 1,13 up           | <b>2,4* up</b>   |
| CPN10                             | O65282 (CH20_ARATH)                        | Not found      | <b>2,43* up</b>   | <b>2* up</b>     |
| ROC1 (CYP18-3)                    | P34790 (CP18C_ARATH)                       | <b>2,0* up</b> | <b>1,84* up</b>   | <b>6,6* down</b> |
| ROC2 (CYP19-3)                    | Q38867 (CP19C_ARATH)                       | <b>3,8* up</b> | <b>1,65* up</b>   | <b>10* down</b>  |
| ROC3 (CYP19-1)                    | Q38900 (CP19A_ARATH)                       | <b>1,4* up</b> | <b>1,41* up</b>   | Not found        |
| ROC4 (CYP20-3)                    | P34791 (CP20C_ARATH)                       | Not found      | <b>4,96* down</b> | <b>10* down</b>  |
| ROC5 (CYP18-4)                    | Q42406 (CP18D_ARATH)                       | <b>1,7* up</b> | <b>1,72* up</b>   | Not found        |

Asterisks indicate statistically significant differences of means (\*P <0.05; \*\*P <0.01), Fisher's LSD.

## References

1. Bettini, P.P.; Marvasi, M.; Fani, F.; Lazzara, L.; Cosi, E.; Melani, L.; Mauro, M.L. *Agrobacterium rhizogenes rolB* gene affects photosynthesis and chlorophyll content in transgenic tomato (*Solanum lycopersicum* L.) plants. *J. Plant. Physiol.* **2016**, *204*, 27-35, doi: 10.1016/j.jplph.2016.07.010.
2. Grishchenko, O.V.; Kiselev, K.V.; Tchernoded, G.K.; Fedoreyev, S.A.; Veselova, M.V.; Bulgakov, V.P.; Zhuravlev, Y.N. *RolB* gene-induced production of isoflavonoids in transformed *Maackia amurensis* cells. *Appl. Microbiol. Biotechnol.* **2016**, *100*, 7479-7489, doi: 10.1007/s00253-016-7483-y.
3. Brzezinka, K.; Altmann, S.; Czesnick, H.; Nicolas, P.; Gorka, M.; Benke, E.; Kabelitz, T.; Jähne, F.; Graf, A.; Kappel, C.; Bäurle, I. *Arabidopsis* FORGETTER1 mediates stress-induced chromatin memory through nucleosome remodeling. *Elife* **2016**, *5*, e17061, doi: 10.7554/eLife.17061.
4. Cheng, Z.; Li, J.F.; Niu, Y.; Zhang, X.C.; Woody, O.Z.; Xiong, Y.; Djonović, S.; Millet, Y.; Bush, J.; McConkey, B.J.; Sheen, J.; Ausubel, F.M. Pathogen-secreted proteases

- activate a novel plant immune pathway. *Nature* **2015**, 521, 213-216, doi: 10.1038/nature14243.
5. Bulgakov, V.P.; Vereshchagina, Y.V.; Bulgakov, D.V.; Veremeichik, G.N.; Shkryl, Y.N. The rolB plant oncogene affects multiple signaling protein modules related to hormone signaling and plant defense. *Sci. Rep.* **2018**, 8, 2285, doi: 10.1038/s41598-018-20694-6.
  6. Ye, L.; Li, L.; Wang, L.; Wang, S.; Li, S.; Du, J.; Zhang, S.; Shou, H. MPK3/MPK6 are involved in iron deficiency-induced ethylene production in *Arabidopsis*. *Front. Plant Sci.* **2015**, 6, 953, doi: 10.3389/fpls.2015.00953.
  7. Zhao, L.; Wang, C.; Zhu, F.; Li, Y. Mild osmotic stress promotes 4-methoxy indolyl-3-methyl glucosinolate biosynthesis mediated by the MKK9-MPK3/MPK6 cascade in *Arabidopsis*. *Plant Cell. Rep.* **2017**, 36, 543-555, doi: 10.1007/s00299-017-2101-8.
  8. Wingenter, K.; Trentmann, O.; Wünsch, I.; Hörmiller, I.I.; Heyer, A.G.; Reinders, J.; Schulz, A.; Geiger, D.; Hedrich, R.; Neuhaus, H.E. A member of the mitogen-activated protein 3-kinase family is involved in the regulation of plant vacuolar glucose uptake. *Plant J.* **2011**, 68, 890-900, doi: 10.1111/j.1365-313X.2011.04739.x.
  9. Arraño-Salinas, P.; Domínguez-Figueroa, J.; Herrera-Vásquez, A.; Zavala, D.; Medina, J.; Vicente-Carbajosa, J.; Meneses, C.; Canessa, P.; Moreno, A.A.; Blanco-Herrera, F. WRKY7, -11 and -17 transcription factors are modulators of the bZIP28 branch of the unfolded protein response during PAMP-triggered immunity in *Arabidopsis thaliana*. *Plant Sci.* **2018**, 277, 242-250, doi: 10.1016/j.plantsci.2018.09.019.

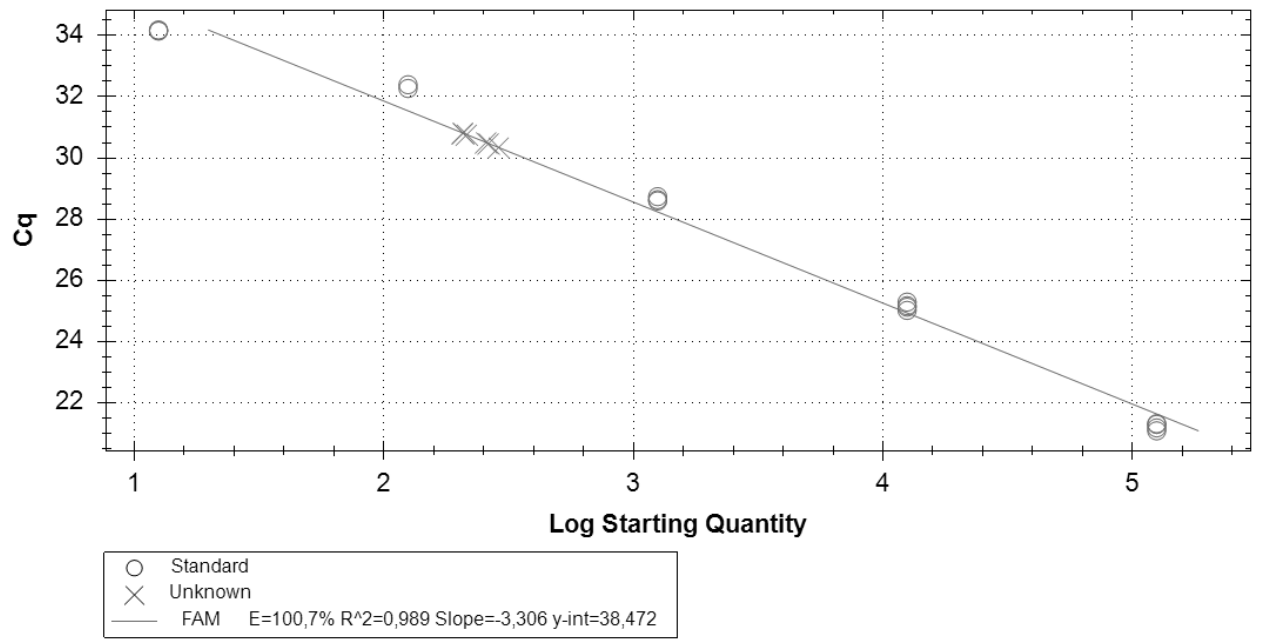

**Supplementary Figure S1.** Standard curve for absolute quantification of *rolB* expression.

Standard curve was constructed using  $1.25 \times 10^1$  to  $1.25 \times 10^5$  copies/ $\mu$ l of *rolB* amplicon (three technical replicates for each standard dilution). The data represent a result from two biological replicates with cDNA samples (marked by a cross) analyzed in triplicate.

**A** BGLU23/PYK10

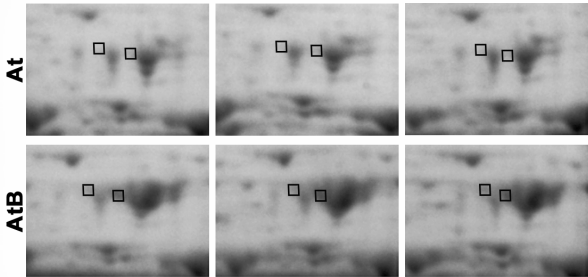

**B** JAL30/PBP1

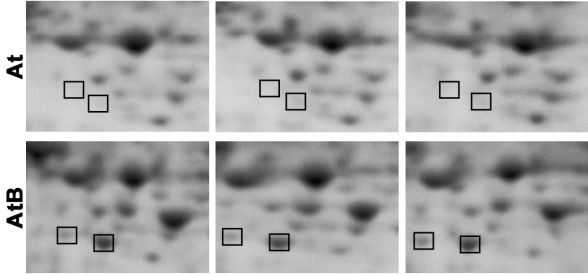

**C** JAL23

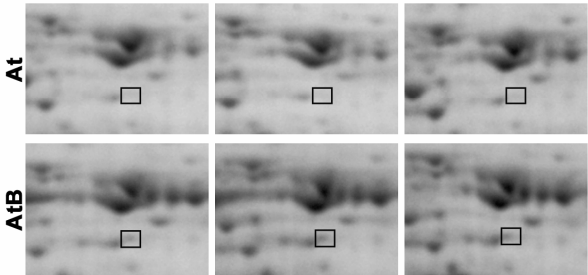

**D** JAL35

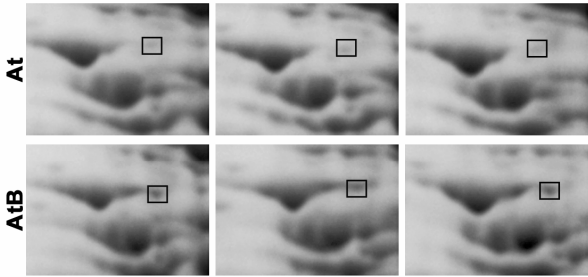

**E** BGLU18

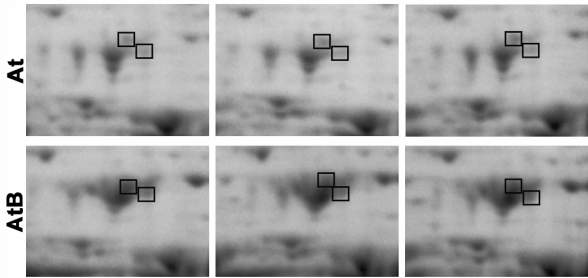

**F** BGLU37

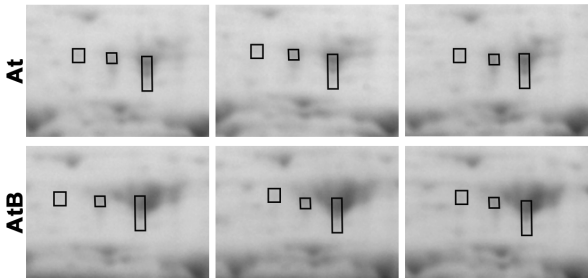

Supplementary Figure S2. Induction of proteins of the PYK10 complex by the *rolB* gene. Fragments of 2D gels of the control (At) and *rolB* AtB-1 (AtB) plant protein fractions are presented. **A-F**: beta-glucosidases 23 (PYK10), PYK10-binding protein 1 (jacalin-related lectin 30)/PBP1, jacalin-related lectin 23, jacalin-related lectin 35, beta-D-glucopyranosyl abscisate beta-glucosidase/BGLU18, and myrosinase 2/Beta-glucosidase 37/ BGLU37
